# Supplementary material for: Urban lizards use sleep sites that mirror the structural, thermal, and light properties of natural sites
Source: Springer Nature journal article supplement (doi:10.1007/s00265-021-03101-5), 2021-12-01
Supplement: MOESM1 [file 265_2021_3101_MOESM1_ESM.pdf]

## **Online Resource 1**

### **Urban lizards use sleep sites that limit illumination but retain structural and thermal properties of natural habitat**

Behavioral Ecology & Sociobiology

Authors: Nitya Prakash Mohanty<sup>1,\*</sup>, Mihir Joshi<sup>1</sup>, Maria Thaker<sup>1</sup>

<sup>1</sup>Centre for Ecological Sciences, Indian Institute of Science, Bangalore, India 560 012

\*Corresponding author: [nitya.mohanty@gmail.com](mailto:nitya.mohanty@gmail.com)

**Table 1** The effects of lizard population (rural or urban) and age (adult or juvenile) with an interaction term (population x age) on the characteristics of sleep site for *Psammophilus dorsalis*. For all regressions, reference values of predictors are “rural” and “adult”; untransformed regression coefficients ( $\pm$ SE) are reported. Statistically significant p-values (at  $\alpha = 0.05$ ) are in bold. NAs are likely a result of model non-convergence due to small sample sizes in that particular contrast

| Model                                            | Response type | Comparison                            |                               |                                  |
|--------------------------------------------------|---------------|---------------------------------------|-------------------------------|----------------------------------|
|                                                  |               | Population                            | Age                           | Population * Age                 |
| Substrate<br>(reference:<br>rocky)               | Vegetative    | -12.22 $\pm$ 229.73<br>(0.957)        | 0.23 $\pm$ 0.69<br>(0.730)    | 13.26 $\pm$<br>229.73<br>(0.953) |
|                                                  | Ground        | 10.75 $\pm$ 212.77<br>(0.959)         | -23.71 $\pm$ 2.83e-08<br>(NA) | -21.81 $\pm$<br>1.06e-09<br>(NA) |
| Perch<br>orientation<br>(reference:<br>vertical) | Horizontal    | -1.62 $\pm$ 0.67<br><b>(0.015)</b>    | 0.10 $\pm$ 0.45<br>(0.810)    | 1.12 $\pm$ 0.80<br>(0.161)       |
|                                                  | Angular       | -13.15 $\pm$ 212.22<br>(0.950)        | 0.55 $\pm$ 0.47<br>(0.246)    | 10.95 $\pm$<br>212.22<br>(0.958) |
| Perch depth<br>(reference:<br>exposed)           | Covered       | 2.07 $\pm$ 0.44<br><b>(&lt;0.001)</b> | -9.99 $\pm$ 44.10<br>(0.820)  | 7.56 $\pm$ 44.10<br>(0.863)      |
|                                                  | Crevice       | 0.48 $\pm$ 0.71<br>(0.492)            | -45.30 $\pm$ NA<br>(NA)       | -14.73 $\pm$ NA<br>(NA)          |
| Perch height                                     | -             | -0.43 $\pm$ 0.49<br>(0.386)           | -0.14 $\pm$ 0.48<br>(0.773)   | -0.67 $\pm$ 0.67<br>(0.316)      |

**Table 2** The effects of lizard sex (male vs female) on the characteristics of sleep site for *Psammophilus dorsalis*. For all regressions, untransformed regression coefficients ( $\pm$ SE) are reported. Statistically significant p-values (at  $\alpha = 0.05$ ) are in bold

| Model                                      | Response type | Sex<br>(reference = female)      |
|--------------------------------------------|---------------|----------------------------------|
|                                            |               |                                  |
| Substrate<br>(reference: rocky)            | Vegetative    | 1.01 $\pm$ 1.01 (0.318)          |
|                                            | Ground        | 8.57 $\pm$ 43.72 (0.844)         |
| Perch orientation<br>(reference: vertical) | Horizontal    | 0.27 $\pm$ 0.58 (0.639)          |
|                                            | Angular       | -0.28 $\pm$ 0.82 (0.731)         |
| Perch depth<br>(reference: exposed)        | Covered       | 1.21 $\pm$ 0.44 ( <b>0.006</b> ) |
|                                            | Crevice       | 2.36 $\pm$ 0.77 ( <b>0.002</b> ) |
| Perch height                               | -             | 0.13 $\pm$ 0.56 (0.81)           |
| Lux*                                       | -             | 1810 (0.782)                     |

**Table 3** Differences in thermal characteristics of sleeping *Psammophilus dorsalis* within rural and urban areas. Thermal measurements, based on thermography, include body (dorsal), perch (adjoining the lizard), substrate (1 m x 1 m area around the lizard), and environment (mean temperature of four ‘unused’ substrates within 1 m radius of the lizard). Shown are results from paired t-tests, with statistically significant p-values (at  $\alpha = 0.05$ ) in bold; confidence intervals (CI) calculated at 95%

| Comparison                    | <i>t</i> | df | Lower CI | Upper CI | <i>p</i>         | Mean difference |
|-------------------------------|----------|----|----------|----------|------------------|-----------------|
| <b><i>Urban adults</i></b>    |          |    |          |          |                  |                 |
| Body vs. Perch                | -5.93    | 26 | -0.64    | -0.31    | <b>&lt;0.001</b> | -0.48           |
| Perch vs. Substrate           | 3.98     | 26 | 0.14     | 0.45     | <b>&lt;0.001</b> | 0.30            |
| Substrate vs. Environment     | 5.37     | 43 | 0.64     | 1.41     | <b>&lt;0.001</b> | 1.03            |
| <b><i>Rural adults</i></b>    |          |    |          |          |                  |                 |
| Body vs. Perch                | -8.85    | 47 | -0.88    | -0.55    | <b>&lt;0.001</b> | -0.72           |
| Perch vs. Substrate           | 4.97     | 47 | 0.22     | 0.52     | <b>&lt;0.001</b> | 0.37            |
| Substrate vs. Environment     | 4.98     | 57 | 0.49     | 1.16     | <b>&lt;0.001</b> | 0.83            |
| <b><i>Urban juveniles</i></b> |          |    |          |          |                  |                 |
| Body vs. Perch                | -4.17    | 35 | -0.44    | -0.15    | <b>&lt;0.001</b> | -0.30           |
| Perch vs. Substrate           | 2.59     | 35 | 0.03     | 0.24     | <b>0.014</b>     | 0.13            |
| Substrate vs. Environment     | 4.21     | 54 | 0.42     | 1.18     | <b>&lt;0.001</b> | 0.80            |
| <b><i>Rural juveniles</i></b> |          |    |          |          |                  |                 |
| Body vs. Perch                | -7.35    | 39 | -0.70    | -0.40    | <b>&lt;0.001</b> | -0.55           |
| Perch vs. Substrate           | 5.63     | 39 | 0.15     | 0.32     | <b>&lt;0.001</b> | 0.24            |
| Substrate vs. Environment     | 5.69     | 47 | 0.69     | 1.44     | <b>&lt;0.001</b> | 1.06            |
